# Supplementary material for: PfCap380 as a marker for Plasmodium falciparum oocyst development in vivo and in vitro
Source: PubMed Central journal article supplement (PMC5880026; doi:10.1186/s12936-018-2277-6), 2018-04-02
Supplement: 12936_2018_2277_MOESM1_ESM.pdf [file 12936_2018_2277_MOESM1_ESM.pdf]

**A**

```

P-f -MIYVCSDSIILHENPYMVVKPIFTLKSYLEYVNGTHIIDDYMSYKYPRKPKHLEYINIPF
P-b KYLIFVDFGITLHANPYVVVNPVFTEDSYYSNMSVQTDYVVSFMYSRKPKLFEFLELPT
P-y KYLIFVDFGITLDTNPYVVVNPVFTEDSYYSNMSVQTDYVVSFMYSRKPKLFEFLELPT
P-v EYQIEVIGLVELHADPYVVIKPIFTHSSYLEYNTVIYTTDDFVAYKYPRKPKYWEFLRIPF
P-g MYSVNVNGNILLDKDPYAVIKPIFTSDSYLYNTSISYDDYVYTKYPRKPKYSEFLDLPI
      . : * . : ** * : * : ** * : ** * * : ** * : * : * * * * : * : *

P-f SRSIFKSNITDLSLVHK---RVEEDHKVCTVYGLFVKSYELIRVIISDIFNNEFVNL V
P-b TQKLFKDNMTITTEQL-----IHQEEETHNIYLLTLVKTLNLTQVIIRDIFNNEFEINI D
P-y TQMLFKDNMTITTEQL-----IHQEEETHNIYLLTLVKTLNLTQVIIRDIFNNEFEVNI D
P-v SKGLFKDKALTRLTVQCNTGRRLGDGAKAHCVYSLVVKSCTLVRRVVRDLYGNEYEVSL D
P-g SKNIFKGDSLNMSVGNII-----NETMNKIDNVYVLPVWKSFNLLSLIIRDMFNNEYVADL T
      : : * . : * : : : : * * * : * : : * : * : * : * : * : :
  
```

**B**

| Species compared to PfCAP380 | Similar amino acids | Identical amino acids | Gaps        |
|------------------------------|---------------------|-----------------------|-------------|
| <i>P. gallinaceum</i>        | 81/109 (74%)        | 52/109 (48%)          | 1/109 (<1%) |
| <i>P. vivax</i>              | 73/109 (66%)        | 50/109 (46%)          | 4/109 (3%)  |
| <i>P. berghei</i>            | 71/110 (64%)        | 51/110 (46%)          | 7/110 (6%)  |
| <i>P. yoelii</i>             | 70/110 (63%)        | 53/110 (48%)          | 7/110 (6%)  |
