# Supplementary material for: PfCap380 as a marker for Plasmodium falciparum oocyst development in vivo and in vitro
Source: PubMed Central journal article supplement (PMC5880026; doi:10.1186/s12936-018-2277-6), 2018-04-02

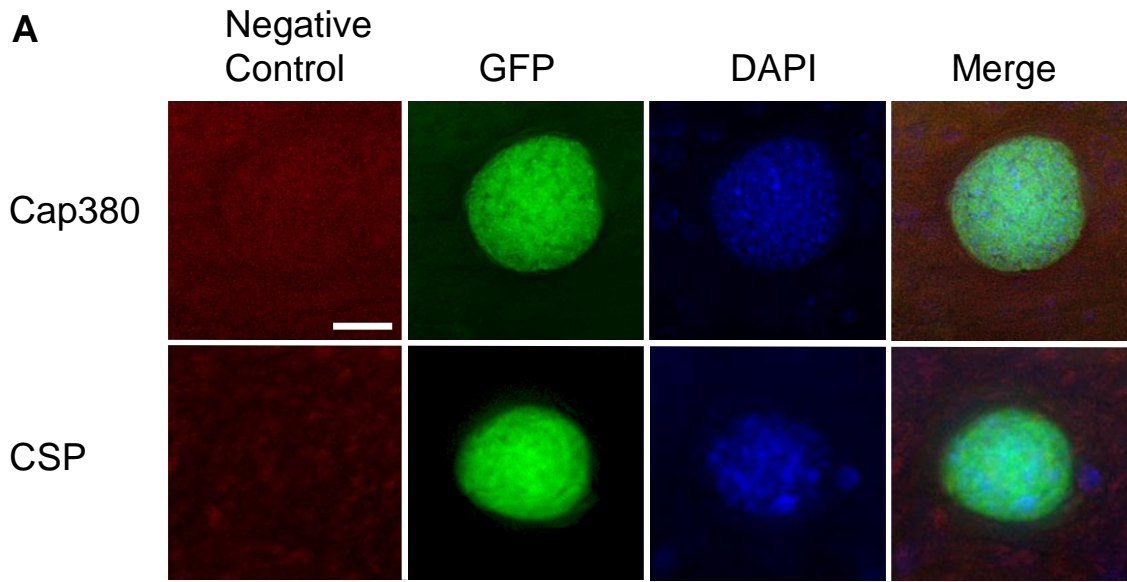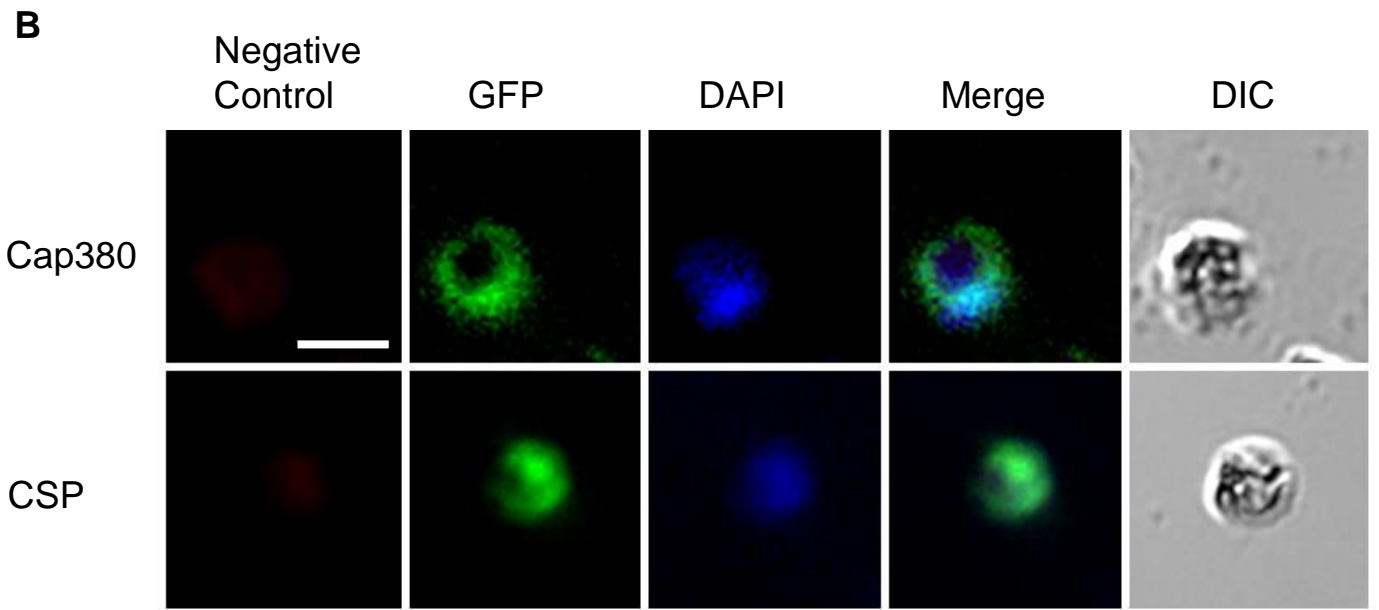

Supplement: 12936_2018_2277_MOESM3_ESM.pdf [file 12936_2018_2277_MOESM3_ESM.pdf]
