# Supplementary material for: PfCap380 as a marker for Plasmodium falciparum oocyst development in vivo and in vitro
Source: Springer Nature journal article supplement (doi:10.1186/s12936-018-2277-6), 2018-04-02

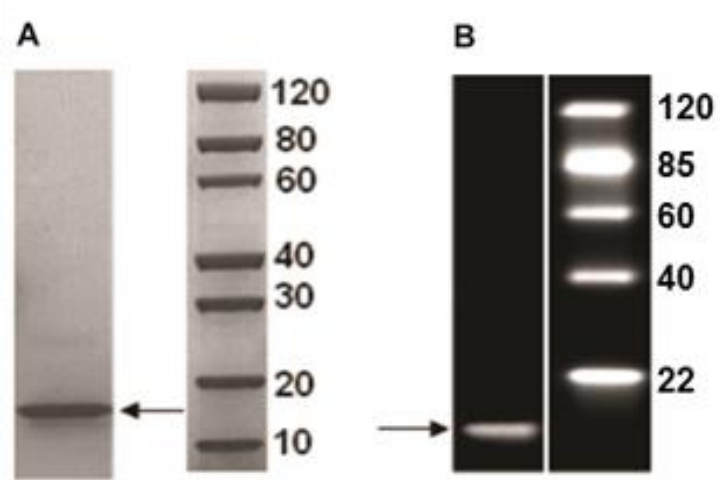

Supplement: MOESM2 [file 15583028]
